# Supplementary material for: CARD8 and IL1B Polymorphisms Influence MRI Brain Patterns in Newborns with Hypoxic-Ischemic Encephalopathy Treated with Hypothermia
Source: PubMed Central journal article supplement (PMC7826682; doi:10.3390/antiox10010096), 2021-01-12
Supplement: antioxidants-10-00096-s001.pdf [file antioxidants-10-00096-s001.pdf]

## Supplementary Materials

**Table S1:** Genotype frequencies of selected polymorphisms.

| Gene                         | SNP        | Role        | Genotype  | N (%)     | MAF   | pHWE  |
|------------------------------|------------|-------------|-----------|-----------|-------|-------|
| <b>Antioxidative pathway</b> |            |             |           |           |       |       |
| <i>SOD2</i>                  | rs4880     | p.Ala16Val  | CC        | 13 (29.5) | 0.420 | 0.271 |
|                              |            |             | CT        | 25 (56.8) |       |       |
|                              |            |             | TT        | 6 (13.6)  |       |       |
| <i>CAT</i>                   | rs1001179  | c.-262C>T   | CC        | 29 (65.9) | 0.193 | 0.729 |
|                              |            |             | CT        | 13 (29.5) |       |       |
|                              |            |             | TT        | 2 (4.5)   |       |       |
| <i>GPX1</i>                  | rs1050450  | p.Pro198Leu | CC        | 19 (43.2) | 0.364 | 0.441 |
|                              |            |             | CT        | 18 (40.9) |       |       |
|                              |            |             | TT        | 7 (15.9)  |       |       |
| <b>Inflammatory pathway</b>  |            |             |           |           |       |       |
| <i>NLRP3</i>                 | rs35829419 | p.Gln705Lys | CC        | 38 (86.4) | 0.068 | 0.627 |
|                              |            |             | CA        | 6 (13.6)  |       |       |
| <i>CARD8</i>                 | rs2043211  | p.Cys10Ter  | AA        | 21 (47.7) | 0.295 | 0.543 |
|                              |            |             | AT        | 20 (45.5) |       |       |
|                              |            |             | TT        | 3 (6.8)   |       |       |
| <i>IL1B</i>                  | rs1143623  | c.-1560G>C  | GG        | 23 (52.3) | 0.273 | 0.836 |
|                              |            |             | GC        | 18 (40.9) |       |       |
|                              |            |             | CC        | 3 (6.8)   |       |       |
|                              | rs16944*   | c.-598T>C   | TT        | 5 (11.4)  | 0.295 | 0.401 |
|                              |            |             | TC        | 16 (36.4) |       |       |
|                              |            |             | CC        | 23 (52.3) |       |       |
| rs1071676                    | c.*505G>C  | GG          | 19 (43.2) | 0.352     | 0.721 |       |
|                              |            | GC          | 19 (43.2) |           |       |       |
|                              |            | CC          | 6 (13.6)  |           |       |       |
| <i>TNF</i>                   | rs1800629  | c.-308 G>A  | GG        | 31 (70.5) | 0.170 | 0.442 |
|                              |            |             | GA        | 11 (25.0) |       |       |
|                              |            |             | AA        | 2 (4.5)   |       |       |

\*polymorphic C allele is more frequent in the population.

Legend: HWE= Hardy Weinberg equilibrium, MAF=minor allele frequency, SNP= single nucleotide polymorphism

**Table S2:** The association of polymorphisms with brainstem and cortex damage.

| Gene         | SNP        | Genotype  | Brainstem             |                           |                   |              | Cortex                |                           |                  |              |
|--------------|------------|-----------|-----------------------|---------------------------|-------------------|--------------|-----------------------|---------------------------|------------------|--------------|
|              |            |           | Normal+ mild<br>N (%) | Moderate+ severe<br>N (%) | OR (95% CI)       | P            | Normal+ mild<br>N (%) | Moderate+ severe<br>N (%) | OR (95% CI)      | P            |
| <i>SOD2</i>  | rs4880     | CC        | 9 (69.2)              | 4 (30.8)                  | Ref.              |              | 10 (76.9)             | 3 (23.1)                  | Ref.             |              |
|              |            | CT+TT     | 26 (83.9)             | 5 (16.1)                  | 0.43 (0.09-1.97)  | 0.279        | 24 (77.4)             | 7 (22.6)                  | 0.97 (0.21-4.54) | 0.971        |
| <i>CAT</i>   | rs1001179  | CC        | 22 (75.9)             | 7 (24.1)                  | Ref.              |              | 21 (72.4)             | 8 (27.6)                  | Ref.             |              |
|              |            | CT+TT     | 13 (86.7)             | 2 (13.3)                  | 0.48 (0.09-2.69)  | 0.406        | 13 (86.7)             | 2 (13.3)                  | 0.40 (0.07-2.20) | 0.295        |
| <i>GPX1</i>  | rs1050450  | CC        | 15 (78.9)             | 4 (21.1)                  | Ref.              |              | 15 (78.9)             | 4 (21.1)                  | Ref.             |              |
|              |            | CT+TT     | 20 (80)               | 5 (20)                    | 0.94 (0.21-4.1)   | 0.932        | 19 (76)               | 6 (24)                    | 1.18 (0.28-4.97) | 0.817        |
| <i>NLRP3</i> | rs35829419 | CC        | 29 (76.3)             | 9 (23.7)                  | Ref.              |              | 28 (73.7)             | 10 (26.3)                 | Ref.             |              |
|              |            | CA        | 6 (100)               | 0 (0)                     | /                 | 0.319*       | 6 (100)               | 0 (0)                     | /                | 0.310*       |
| <i>CARD8</i> | rs2043211  | AA        | 13 (61.9)             | 8 (38.1)                  | Ref.              |              | 13 (61.9)             | 8 (38.1)                  | Ref.             |              |
|              |            | AT+TT     | 22 (95.7)             | 1 (4.3)                   | 0.07 (0.01-0.66)  | <b>0.020</b> | 21 (91.3)             | 2 (8.7)                   | 0.15 (0.03-0.84) | <b>0.031</b> |
| <i>IL1B</i>  | rs1143623  | GG        | 19 (82.6)             | 4 (17.4)                  | Ref.              |              | 19 (82.6)             | 4 (17.4)                  | Ref.             |              |
|              |            | GC+CC     | 16 (76.2)             | 5 (23.8)                  | 1.48 (0.34-6.48)  | 0.599        | 15 (71.4)             | 6 (28.6)                  | 1.90 (0.45-7.98) | 0.381        |
|              | rs16944    | CC        | 19 (82.6)             | 4 (17.4)                  | Ref.              |              | 19 (82.6)             | 4 (17.4)                  | Ref.             |              |
|              |            | TC+TT     | 16 (76.2)             | 5 (23.8)                  | 1.48 (0.34-6.48)  | 0.599        | 15 (71.4)             | 6 (28.6)                  | 1.90 (0.45-7.98) | 0.381        |
| rs1071676    | GG         | 14 (73.7) | 5 (26.3)              | Ref.                      |                   | 14 (73.7)    | 5 (26.3)              | Ref.                      |                  |              |
|              | GC+CC      | 21 (84)   | 4 (16)                | 0.53 (0.12-2.34)          | 0.405             | 20 (80)      | 5 (20)                | 0.70 (0.17-2.88)          | 0.621            |              |
| <i>TNF</i>   | rs1800629  | GG        | 26 (83.9)             | 5 (16.1)                  | Ref.              |              | 24 (77.4)             | 7 (22.6)                  | Ref.             |              |
|              |            | GA+AA     | 9 (69.2)              | 4 (30.8)                  | 2.31 (0.51-10.54) | 0.279        | 10 (76.9)             | 3 (23.1)                  | 1.03 (0.22-4.80) | 0.971        |

\*calculated using Fisher's exact test

Legend: CI= confidence interval, OR=odds ratio, SNP=single nucleotide polymorphism.
